# Supplementary material
Source: Research Square preprint supplement (doi:10.21203/rs.3.rs-9065755/v1)
Supplement: Supplementary file 1 [file 0655f2e0bf491f859b97dc46.pdf]

**INFORM CONCENT FORM**

My name is Saad Sullaiman, a final year physiotherapy student, Faculty of Allied Health Sciences, Bayero University Kano. I am conducting a study titled “**Prevalence of dementia among neurological patients in some Selected Hospital in Kano State, Nigeria.** Northwestern

Nigeria”. This study is purely for research purpose as such all information given will be treated with utmost confidentiality. Your participation in this study is strictly voluntary and you can withdraw at any point of time, your full cooperation and participation will be greatly appreciated and you are free to ask questions about the study, hence you are expected to respond to every question with sincerity.

I..... Here by testify that I have been fully informed about the research and what it entails and I am fully convinced with all the explanations given to me regarding the research by the researcher. In view of this, I therefore consent to be part of this research as a subject and promise to cooperate and be committed up to the end of the research.

.....

.....

Signature of participant

Signature of Researcher
