# Supplementary material
Source: Research Square preprint supplement (doi:10.21203/rs.3.rs-9065755/v1)
Supplement: Supplementary file 2 [file 7e288bca1355aa659fe51f42.pdf]

**BLESSED DEMENTIA SCALE**

Patient Name: \_\_\_\_\_ Date: \_\_\_\_\_

Rater Name: \_\_\_\_\_

Instructions: Total incapacity in an activity is rated 1 and partial; variable or intermittent incapacity is awarded a half-point. Overall score ranges from 0 (normal) to 28 (extreme incapacity).

**CHANGES IN PERFORMANCE OF EVERYDAY ACTIVITIES**

|                                                                                                                                                      |  |
|------------------------------------------------------------------------------------------------------------------------------------------------------|--|
| Inability to perform household tasks                                                                                                                 |  |
| Inability to cope with small sums of money                                                                                                           |  |
| Inability to remember shortlist of items (e.g., in shopping list)                                                                                    |  |
| Inability to find way about indoors                                                                                                                  |  |
| Inability to find way about familiar streets                                                                                                         |  |
| Inability to interpret surroundings (e.g., recognize whether in hospital or at home; discriminate between patients, doctors, nurse, relatives, etc.) |  |
| Inability to recall recent events (e.g., recent outings, visits of relatives or friends to hospital, etc.)                                           |  |
| Tendency to dwell in the past                                                                                                                        |  |

**CHANGES IN HABITS**

Eating: \_\_\_\_\_

- (0) = cleanly, with proper utensils.
- (1) = messily, with spoon only.
- (2) = simple solids (for example, biscuits).
- (3) = has to be fed.

Sphincter control: \_\_\_\_\_

- (0) = complete control.
- (1) = occasional wet bed.
- (2) = frequent wet bed.
- (3) = doubly incontinent.

Dressing: \_\_\_\_\_

(0) = unaided

(1) = occasionally misplaced buttons, etc.

(2) = wrong sequence, commonly forgetting items

(3) = unable to dress

### **CHANGES IN PERSONALITY, INTERESTS, DRIVE**

|                                                                                     |  |
|-------------------------------------------------------------------------------------|--|
| Increased rigidity                                                                  |  |
| Increased egocentricity                                                             |  |
| Impairment of regard of feeling for others                                          |  |
| Coarsening of affect                                                                |  |
| Impairment of emotional control (for example, increased petulance and irritability) |  |
| Hilarity in inappropriate situations                                                |  |
| Diminished emotional responsiveness                                                 |  |
| Sexual misdemeanour (arising de novo in old age)                                    |  |
| Hobbies relinquished                                                                |  |
| Diminished initiative or growing apathy                                             |  |
| Purposeless hyperactivity                                                           |  |
