# Supplementary material
Source: Research Square preprint supplement (doi:10.21203/rs.3.rs-9065755/v1)
Supplement: Supplementary file 4 [file fd3984189f99984c886d3c25.pdf]

# Mini-Cog Cognitive Screening Tool

---

Patient ID: \_\_\_\_\_ Date: \_\_\_\_\_

## **Step 1: Three-Word Registration**

Instruction: Say the following words clearly and ask the patient to repeat them.

Word List (circle one version):

1. Banana Sunrise Chair
2. Leader Season Table
3. Village Kitchen Baby
4. River Nation Finger
5. Captain Garden Picture
6. Daughter Heaven Mountain

Patient repeats words correctly: Yes [] No []

## **Step 2: Clock Drawing Test**

Instruction: Ask the patient to draw a clock, put in all numbers, and set the time to 10 past 11.

Draw clock here:

### **Step 3: Three-Word Recall**

Ask: "What were the three words I asked you to remember?"

Word 1: \_\_\_\_\_

Word 2: \_\_\_\_\_

Word 3: \_\_\_\_\_

### **Scoring**

Word Recall Score (0-3): \_\_\_\_\_

Clock Drawing Score (0 or 2): \_\_\_\_\_

Total Score (0-5): \_\_\_\_\_

### **Interpretation**

Score < 3: Suggestive of dementia

Score < 4: Indicates need for further evaluation
